# Supplementary material for: Dorsal Cortical Screw Penetration in Volar Distal Radius Plating: Comparison of 3 Fluoroscopic Views
Source: PubMed Central journal article supplement — Plast Reconstr Surg Glob Open. 2024 Nov 12;12(11):e6320. doi: 10.1097/GOX.0000000000006320 (PMC11556970; doi:10.1097/gox.0000000000006320), 2024-11-12
Supplement: gox-12-e6320-s001.pdf [file gox-12-e6320-s001.pdf]

| Case n. | Sex | Side | Age | PLATE    | Fracture Type<br>AO | LV | DTV | CST | Screw Number<br>detected | mm beyond<br>cortex |
|---------|-----|------|-----|----------|---------------------|----|-----|-----|--------------------------|---------------------|
| 1       | M   | R    | 41  | VA-LCP 7 | 2R3B2.3             | 1  | 1   | 2   | 1, 3                     | 2mm/1mm             |
| 2       | M   | R    | 35  | VA-LCP 6 | 2R3A3.1             |    |     |     |                          |                     |
| 3       | M   | L    | 36  | VA-LCP 6 | 2R3A3.3             |    |     |     |                          |                     |
| 4       | F   | L    | 38  | VA-LCP 6 | 2R3A2.3             |    |     |     |                          |                     |
| 5       | F   | L    | 55  | VA-LCP 6 | 2R3A2.3             |    |     |     |                          |                     |
| 6       | F   | R    | 86  | VA-LCP 6 | 2R3B1.3             |    | 1   | 1   | 2                        | 2mm                 |
| 7       | F   | L    | 39  | VA-LCP 6 | 2R3A2.3             |    |     |     |                          |                     |
| 8       | M   | R    | 50  | VA-LCP 6 | 2R3A3.3             |    |     |     |                          |                     |
| 9       | F   | L    | 56  | VA-LCP 6 | 2R3C1.2             |    |     |     |                          |                     |
| 10      | M   | L    | 50  | VA-LCP 6 | 2R3B2.1             |    |     |     |                          |                     |
| 11      | M   | L    | 46  | VA-LCP 7 | 2R3A2.3             |    |     | 1   | 1                        | 0.5mm               |
| 12      | F   | R    | 44  | VA-LCP 6 | 2R3B2.1             |    |     |     |                          |                     |
| 13      | M   | L    | 47  | VA-LCP 6 | 2R3B2.1             |    |     |     |                          |                     |
| 14      | F   | R    | 71  | VA-LCP 6 | 2R3B2.3             |    |     |     |                          |                     |
| 15      | M   | L    | 55  | VA-LCP 6 | 2R3C1.2             |    |     |     |                          |                     |
| 16      | M   | R    | 89  | VA-LCP 6 | 2R3B2.1             |    |     |     |                          |                     |
| 17      | F   | L    | 88  | VA-LCP 6 | 2R3B2.1             |    |     |     |                          |                     |
| 18      | F   | R    | 61  | VA-LCP 6 | 2R3C1.1             |    |     | 1   | 3                        | 0.5 mm              |
| 19      | M   | R    | 64  | VA-LCP 6 | 2R3B3.3             |    |     |     |                          |                     |
| 20      | M   | R    | 42  | VA-LCP 7 | 2R3B2.3             |    | 1   | 1   | 1                        | 1mm                 |
| 21      | F   | L    | 46  | VA-LCP 6 | 2R3A2.3             |    |     |     |                          |                     |
| 22      | M   | L    | 53  | VA-LCP 7 | 2R3B2.1             |    |     |     |                          |                     |
| 23      | M   | R    | 50  | VA-LCP 7 | 2R3A3.3             |    | 1   | 1   | 3                        | 2mm                 |
| 24      | F   | R    | 86  | VA-LCP 6 | 2R3B2.1             |    |     |     |                          |                     |
| 25      | M   | R    | 46  | VA-LCP 6 | 2R3A2.1             |    |     |     |                          |                     |
| 26      | M   | L    | 73  | VA-LCP 6 | 2R3B3.1             |    |     |     |                          |                     |

|           |   |   |    |          |         |  |   |   |   |      |
|-----------|---|---|----|----------|---------|--|---|---|---|------|
| <b>27</b> | F | L | 58 | VA-LCP 6 | 2R3A2.3 |  |   |   |   |      |
| <b>28</b> | F | R | 69 | VA-LCP 6 | 2R3A2.1 |  |   |   |   |      |
| <b>29</b> | M | R | 54 | VA-LCP 6 | 2R3A2.3 |  |   |   |   |      |
| <b>30</b> | M | R | 52 | VA-LCP 7 | 2R3C1.2 |  |   | 1 | 2 | 1mm  |
| <b>31</b> | M | L | 44 | VA-LCP 6 | 2R3A2.3 |  |   |   |   |      |
| <b>32</b> | M | L | 47 | VA-LCP 6 | 2R3A3.3 |  |   |   |   |      |
| <b>33</b> | M | R | 58 | VA-LCP 6 | 2R3A2.3 |  |   |   |   |      |
| <b>34</b> | F | R | 39 | VA-LCP 6 | 2R3B2.3 |  | 1 | 1 | 2 | 2 mm |
| <b>35</b> | M | L | 48 | VA-LCP 6 | 2R3C1.1 |  |   |   |   |      |
| <b>36</b> | F | R | 70 | VA-LCP 6 | 2R3B2.1 |  |   |   |   |      |
| <b>37</b> | F | R | 59 | VA-LCP 6 | 2R3A2.3 |  |   |   |   |      |
| <b>38</b> | F | L | 49 | VA-LCP 6 | 2R3A2.2 |  |   |   |   |      |
| <b>39</b> | F | L | 42 | VA-LCP 6 | 2R3A3.3 |  |   |   |   |      |
| <b>40</b> | F | L | 47 | VA-LCP 6 | 2R3A2.3 |  |   |   |   |      |
| <b>41</b> | F | L | 42 | VA-LCP 6 | 2R3A2.3 |  |   |   |   |      |
| <b>42</b> | F | R | 50 | VA-LCP 6 | 2R3A2.3 |  |   |   |   |      |
| <b>43</b> | F | R | 86 | VA-LCP 6 | 2R3A3.1 |  |   |   |   |      |
| <b>44</b> | F | R | 52 | VA-LCP 6 | 2R3B2.1 |  |   |   |   |      |
| <b>45</b> | F | R | 39 | VA-LCP 6 | 2R3A2.3 |  |   |   |   |      |
| <b>46</b> | M | R | 26 | VA-LCP 7 | 2R3B2.1 |  |   |   |   |      |
| <b>47</b> | M | L | 58 | VA-LCP 7 | 2R3A3.2 |  |   |   |   |      |
| <b>48</b> | F | L | 50 | VA-LCP 6 | 2R3A2.3 |  |   |   |   |      |
| <b>49</b> | M | L | 38 | VA-LCP 7 | 2R3A3.3 |  | 1 | 1 | 3 | 2mm  |
| <b>50</b> | F | R | 44 | VA-LCP 6 | 2R3A2.3 |  |   |   |   |      |
| <b>51</b> | M | R | 48 | VA-LCP 7 | 2R3A3.3 |  |   |   |   |      |
| <b>52</b> | F | L | 71 | VA-LCP 6 | 2R3A2.2 |  |   |   |   |      |
| <b>53</b> | F | L | 64 | VA-LCP 6 | 2R3C2.1 |  |   |   |   |      |
| <b>54</b> | M | R | 48 | VA-LCP 7 | 2R3A2.3 |  |   |   |   |      |
| <b>55</b> | F | R | 55 | VA-LCP 6 | 2R3A2.3 |  |   |   |   |      |

|    |   |   |    |          |         |   |   |   |   |        |
|----|---|---|----|----------|---------|---|---|---|---|--------|
| 56 | F | L | 45 | VA-LCP 6 | 2R3A2.3 |   |   |   |   |        |
| 57 | M | L | 38 | VA-LCP 6 | 2R3B2.1 |   |   |   |   |        |
| 58 | M | L | 33 | VA-LCP 6 | 2R3A3.2 |   |   |   |   |        |
| 59 | M | R | 46 | VA-LCP 6 | 2R3B2.1 |   |   |   |   |        |
| 60 | M | R | 53 | VA-LCP 6 | 2R3B2.1 |   |   |   |   |        |
| 61 | F | R | 61 | VA-LCP 6 | 2R3C1.1 | 1 | 1 | 1 | 2 | 1mm    |
| 62 | F | R | 64 | VA-LCP 6 | 2R3A2.2 |   |   |   |   |        |
| 63 | F | L | 42 | VA-LCP 6 | 2R3B2.3 |   |   |   |   |        |
| 64 | M | R | 46 | VA-LCP 7 | 2R3B2.3 |   | 1 | 1 | 3 | 0.5 mm |
| 65 | M | L | 53 | VA-LCP 7 | 2R3A2.1 |   |   |   |   |        |
| 66 | F | R | 50 | VA-LCP 6 | 2R3A2.3 |   |   |   |   |        |
| 67 | F | L | 86 | VA-LCP 6 | 2R3A3.1 |   |   |   |   |        |
| 68 | M | L | 46 | VA-LCP 7 | 2R3B2.1 |   |   |   |   |        |
| 69 | M | L | 73 | VA-LCP 7 | 2R3B2.1 |   |   |   |   |        |
| 70 | F | L | 58 | VA-LCP 6 | 2R3B2.2 |   |   |   |   |        |
| 71 | F | L | 69 | VA-LCP 6 | 2R3A2.3 |   |   |   |   |        |
| 72 | F | L | 54 | VA-LCP 6 | 2R3A3.1 |   |   |   |   |        |
| 73 | M | L | 35 | VA-LCP 6 | 2R3B2.1 |   |   |   |   |        |
| 74 | M | L | 44 | VA-LCP 6 | 2R3A2.2 |   |   |   |   |        |
| 75 | M | L | 47 | VA-LCP 6 | 2R3A2.2 |   |   |   |   |        |
| 76 | F | L | 58 | VA-LCP 6 | 2R3B3.3 |   | 1 | 1 | 3 | 2mm    |
| 77 | M | L | 39 | VA-LCP 7 | 2R3B2.1 |   |   |   |   |        |
| 78 | F | L | 29 | VA-LCP 6 | 2R3A3.1 |   |   |   |   |        |
| 79 | F | L | 70 | VA-LCP 6 | 2R3A2.2 |   |   |   |   |        |
| 80 | F | L | 24 | VA-LCP 6 | 2R3B2.1 |   |   |   |   |        |

SDC 1: Demographics of the patients with the type of fracture, used plate, detected screws for single view.
